# Supplementary material
Source: PubMed Central journal article supplement (PMC7610597)
Supplement: EMS118390-supplement-Source_Data_ED_Fig__5.pdf [file EMS118390-supplement-Source_Data_ED_Fig__5.pdf]

## Extended Data Fig. 5 – Panel a

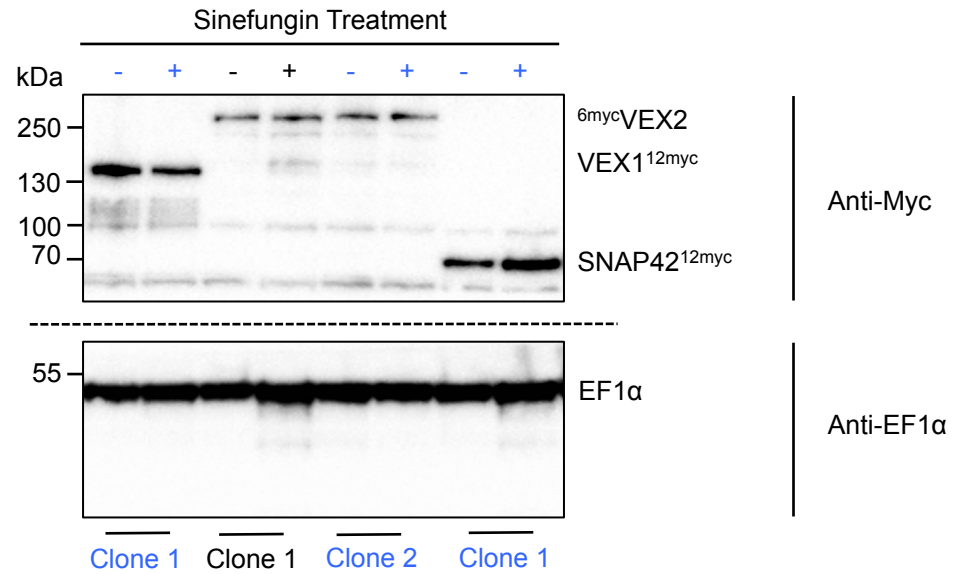

### Clones depicted in the Figure

----- The membrane was cropped to enable multiple probing
