# Supplementary material
Source: PubMed Central journal article supplement (PMC7610597)
Supplement: EMS118390-supplement-Source_Data_ED_Fig__6.pdf [file EMS118390-supplement-Source_Data_ED_Fig__6.pdf]

# Extended Data Fig. 6b – Part 1

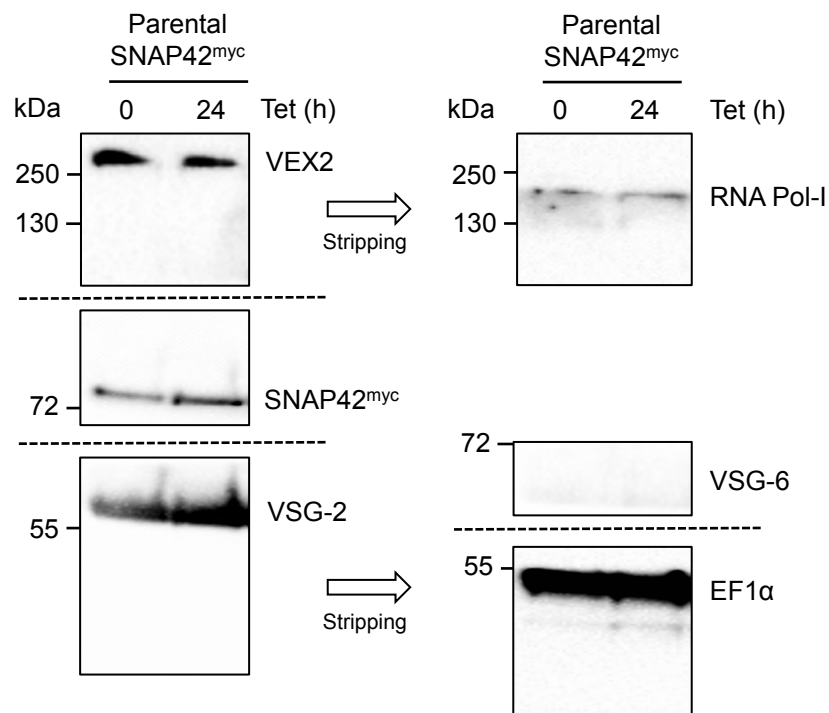

----- The membrane was cropped to enable multiple probing

## Extended Data Fig. 6b – Part 2

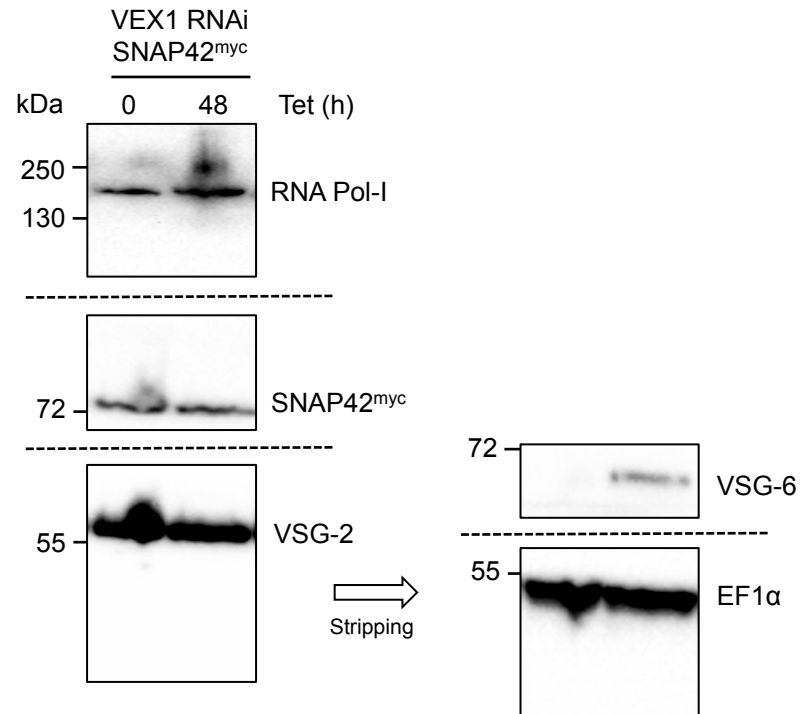

----- The membrane was cropped to enable multiple probing

### Extended Data Fig. 6b – Part 3

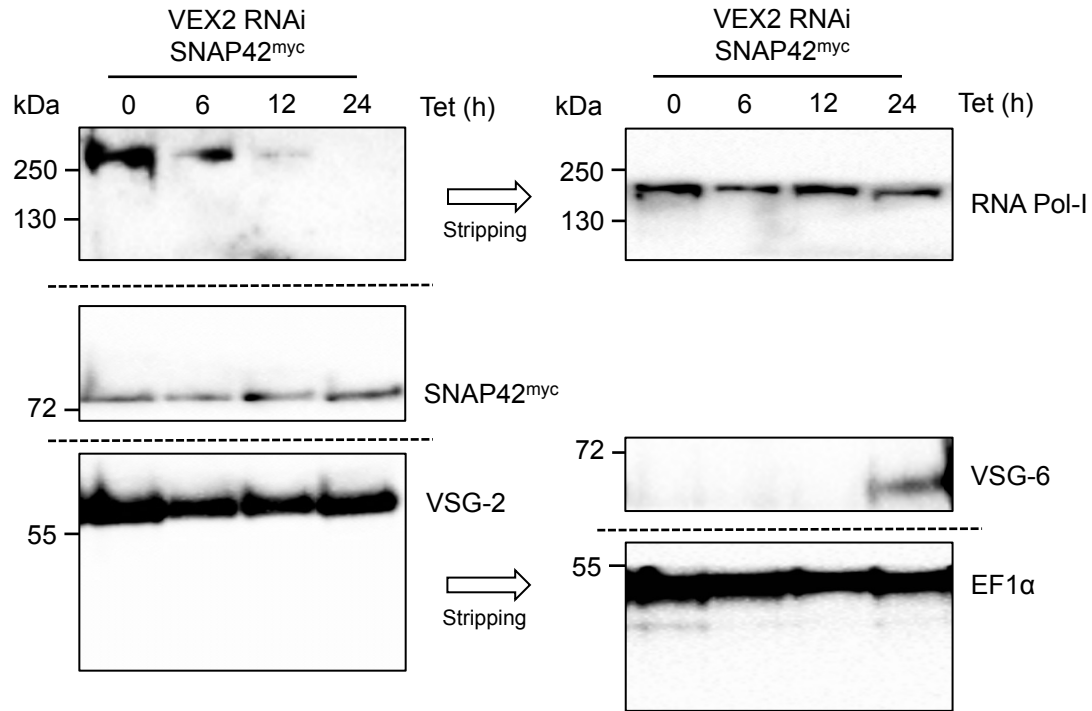

----- The membrane was cropped to enable multiple probing

## Extended Data Fig. 6b – Part 4

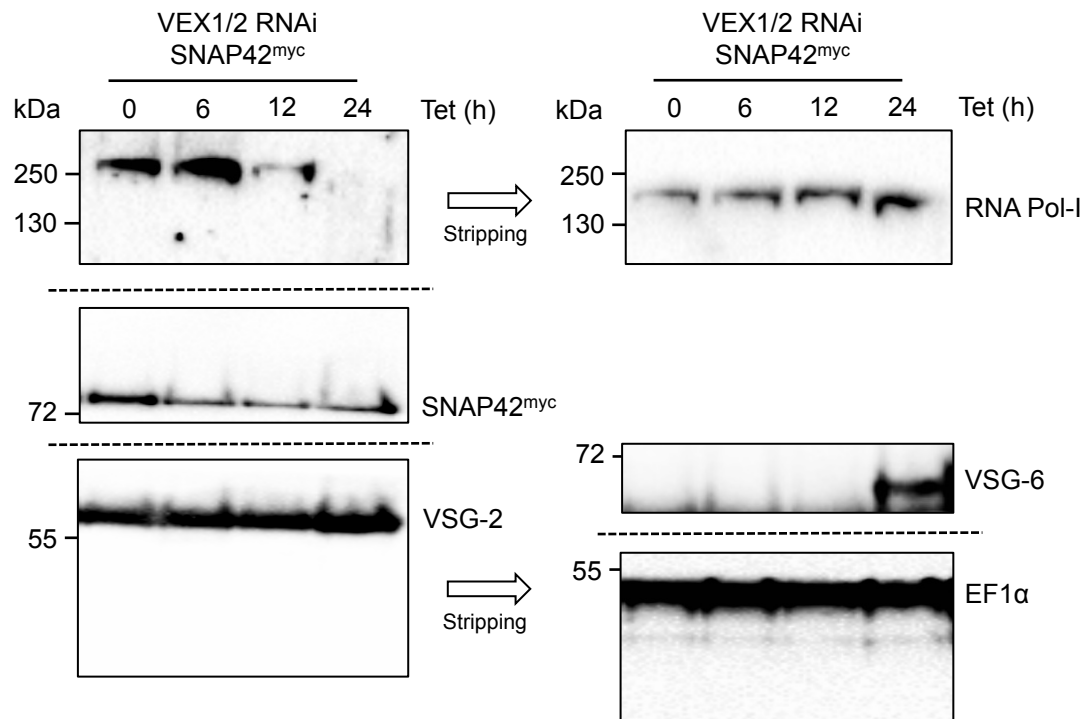

----- The membrane was cropped to enable multiple probing
